# Supplementary material for: The mechanism of universal green antisolvents for intermediate phase controlled high-efficiency formamidinium-based perovskite solar cells
Source: Royal Society of Chemistry journal article supplement (doi:10.1039/c9mh01679a), 2019-12-05
Supplement: c9mh01679a1.pdf [file c9mh01679a1.pdf]

## Supporting Information

### The Mechanism of Universal Green Antisolvent for Intermediate Phase Controlled High-Efficiency Formamidinium-Based Perovskite Solar Cells

LuYao Wang, Xin Wang, Lin-Long Deng, ShiBing Leng, XiaoJun Guo, *Ching-Hong Tan*, Wallace C. H. Choy\*, Chun-Chao Chen\*

**Table S1** Physical characteristics of antisolvents commonly used to prepare PSCs

| Solvent                 | Relative Polarity | Boiling Point (°C) |
|-------------------------|-------------------|--------------------|
| Water                   | 1                 | 100                |
| Chlorobenzene (CB)      | 0.188             | 131.7              |
| Anisole (ANS)           | 0.198             | 153.6              |
| Diethyl ether (DE)      | 0.117             | 34.6               |
| Diisopropyl ether (DIE) | 0.110             | 68.3               |
| Dibutyl ether (DBE)     | 0.071             | 140.3              |

Physical constants taken from reference<sup>1</sup>.

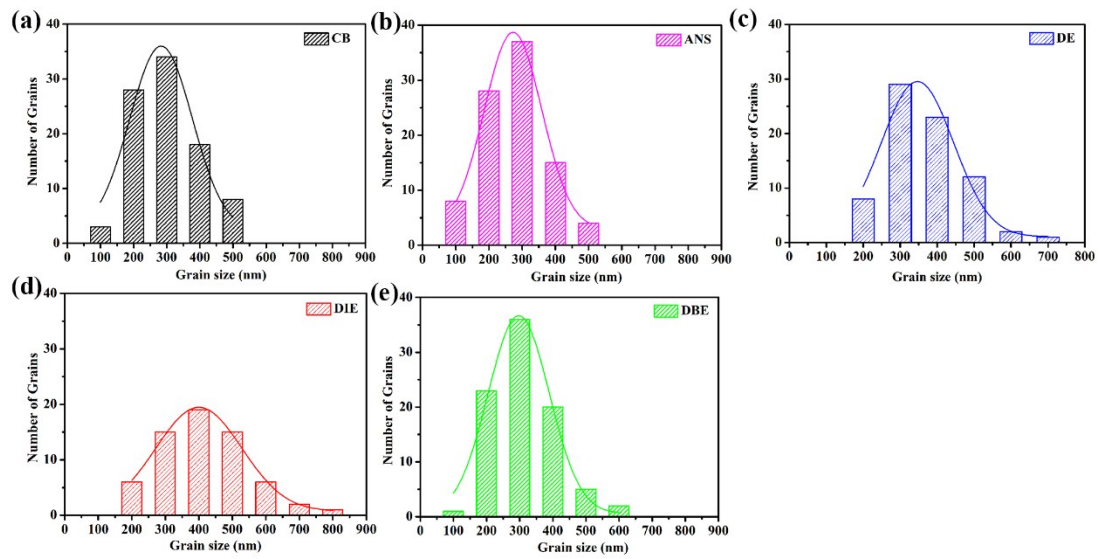

**Figure S1.** Statistical distributions of grain sizes of perovskite films prepared using (a) CB, (b) ANS, (c) DE, (d) DIE, and (e) DBE as antisolvents.

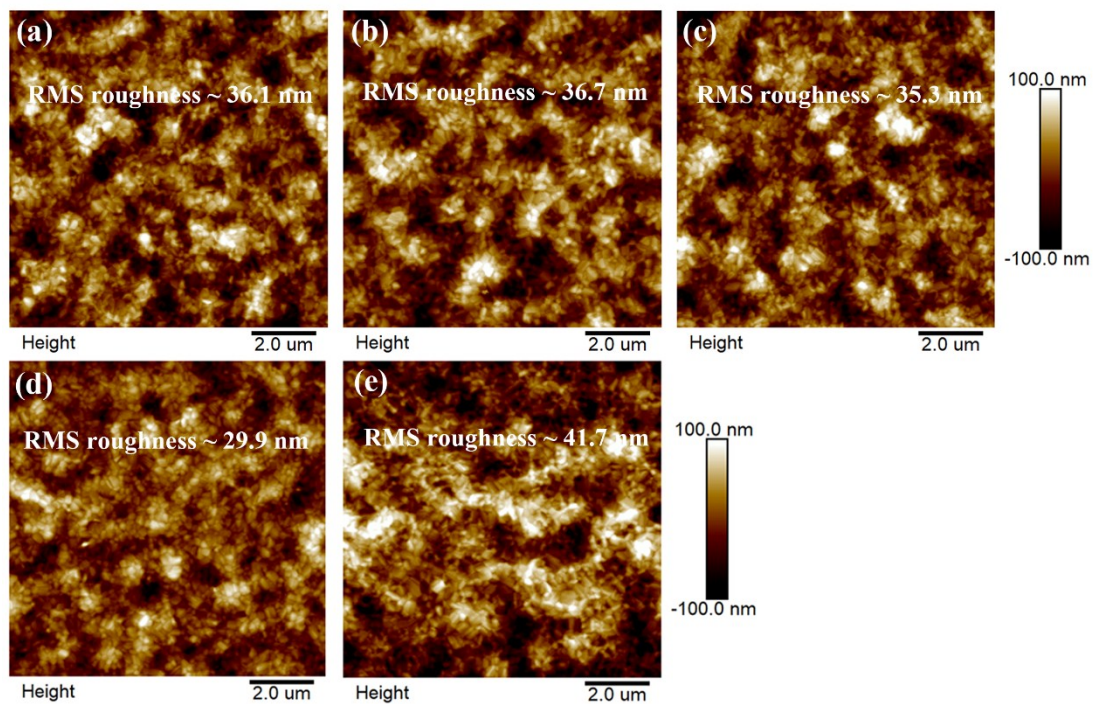

**Figure S2.** Top-view AFM images of perovskite films prepared using (a) CB, (b) ANS, (c) DE, (d) DIE, and (e) DBE as antisolvents.

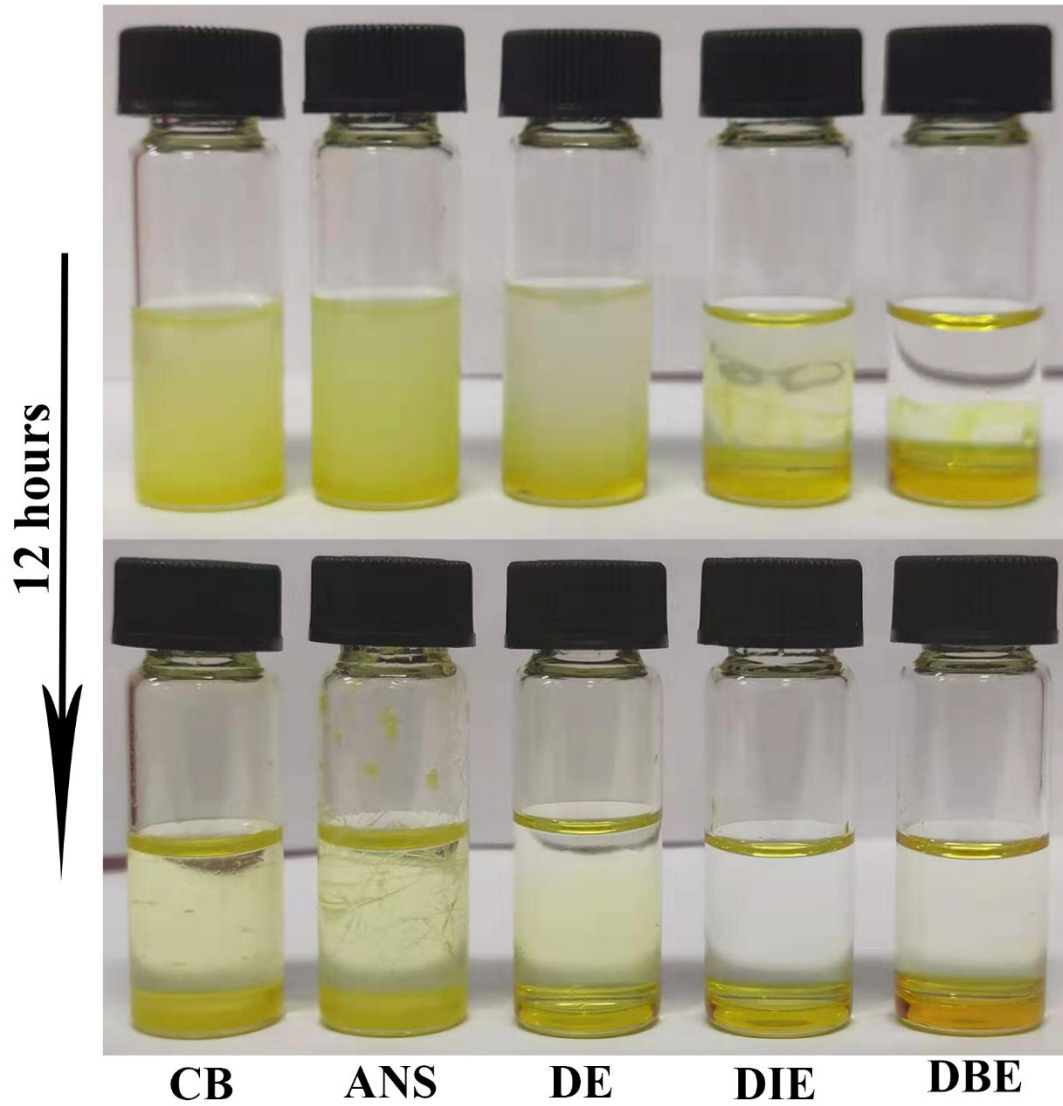

**Figure S3.** Photographs taken 0 and 12 h after adding various antisolvents into solutions of the perovskite precursor.

**Table S2** Performances of PSC devices prepared on mp-TiO<sub>2</sub> as the ETL, with treatment using various common antisolvents

| ET<br>L                        | Antisolvent | Volume<br>( $\mu$ L) | Perovskite system                                                                                                                     | PCE<br>(%) | Published<br>year | Ref.         |
|--------------------------------|-------------|----------------------|---------------------------------------------------------------------------------------------------------------------------------------|------------|-------------------|--------------|
| Mesoporous<br>TiO <sub>2</sub> | CB          | 100                  | Cs <sub>0.1</sub> (FA <sub>0.83</sub> MA <sub>0.17</sub> ) <sub>0.9</sub><br>Pb(I <sub>0.83</sub> Br <sub>0.17</sub> ) <sub>3</sub>   | 21.17%     | 2016              | [2]          |
| Mesoporous<br>TiO <sub>2</sub> | DE          | 800                  | Cs <sub>0.05</sub> (FA <sub>0.83</sub> MA <sub>0.17</sub> ) <sub>0.95</sub><br>Pb(I <sub>0.83</sub> Br <sub>0.17</sub> ) <sub>3</sub> | 19.5%      | 2017              | [3]          |
| Mesoporous<br>TiO <sub>2</sub> | ANS         | 200                  | Cs <sub>0.05</sub> (FA <sub>0.83</sub> MA <sub>0.17</sub> ) <sub>0.95</sub><br>Pb(I <sub>0.83</sub> Br <sub>0.17</sub> ) <sub>3</sub> | 19.4%      | 2018              | [4]          |
| Mesoporous<br>TiO <sub>2</sub> | ANS         | 100                  | Cs <sub>0.05</sub> (FA <sub>0.83</sub> MA <sub>0.17</sub> ) <sub>0.95</sub><br>Pb(I <sub>0.9</sub> Br <sub>0.1</sub> ) <sub>3</sub>   | 20.2%      | 2018              | [5]          |
| Mesoporous<br>TiO <sub>2</sub> | CB          | 200                  | Cs <sub>0.05</sub> (FA <sub>0.83</sub> MA <sub>0.17</sub> ) <sub>0.95</sub><br>Pb(I <sub>0.83</sub> Br <sub>0.17</sub> ) <sub>3</sub> | 20.8%      | 2018              | [6]          |
| Mesoporous<br>TiO <sub>2</sub> | TL          | 200                  | Cs <sub>0.05</sub> (FA <sub>0.83</sub> MA <sub>0.17</sub> ) <sub>0.95</sub><br>Pb(I <sub>0.9</sub> Br <sub>0.1</sub> ) <sub>3</sub>   | 19.9%      | 2018              | [6]          |
| Mesoporous<br>TiO <sub>2</sub> | TL          | 200                  | Cs <sub>0.05</sub> (FA <sub>0.83</sub> MA <sub>0.17</sub> ) <sub>0.95</sub><br>Pb(I <sub>0.83</sub> Br <sub>0.17</sub> ) <sub>3</sub> | 18.37%     | 2018              | [7]          |
| Mesoporous<br>TiO <sub>2</sub> | ANS         | 800                  | Cs <sub>0.05</sub> (FA <sub>0.83</sub> MA <sub>0.17</sub> ) <sub>0.95</sub><br>Pb(I <sub>0.83</sub> Br <sub>0.17</sub> ) <sub>3</sub> | 20.53%     | 2018              | [7]          |
| Mesoporous<br>TiO <sub>2</sub> | DIE         | 500                  | Cs <sub>0.05</sub> (FA <sub>0.83</sub> MA <sub>0.17</sub> ) <sub>0.95</sub><br>Pb(I <sub>0.83</sub> Br <sub>0.17</sub> ) <sub>3</sub> | 21.26%     |                   | This<br>work |

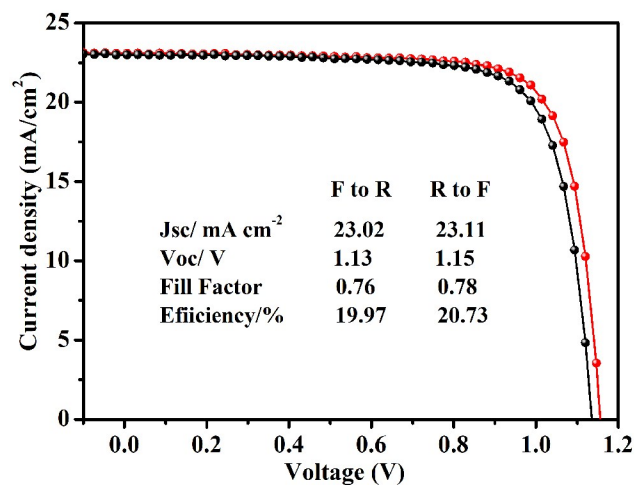

**Figure S4.**  $J$ - $V$  characteristics of triple-mixed perovskite solar cells that had been prepared through treatment with DIE. Scan rate: 20 mV/s.

**Table S3.** Parameters determined from the TRPL spectra of FA/MA/Cs perovskite films that had been prepared through treatment with CB and DIE

| Antisolvent | $A_1$ (%) | $\tau_1$ (ns) | $A_2$ (%) | $\tau_2$ (ns) | $\tau_{ave}$ (ns) |
|-------------|-----------|---------------|-----------|---------------|-------------------|
| CB          | 11.24     | 4.67          | 88.76     | 46.08         | 41.42             |
| DIE         | 10.97     | 4.97          | 89.03     | 52.42         | 47.22             |

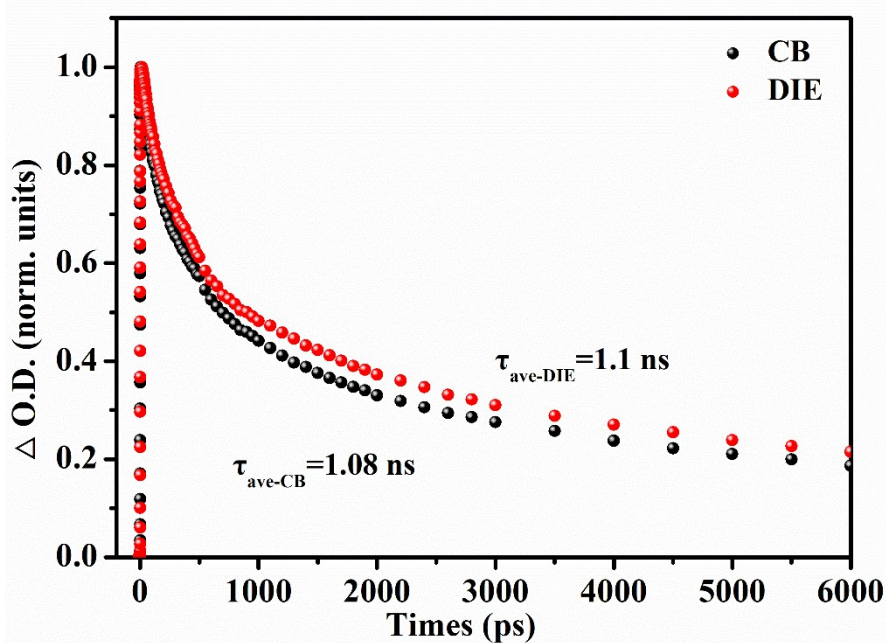

**Figure S5.** Normalized bleach kinetics for triple-mixed perovskite films treated with CB and DIE traced probed at 751 nm.

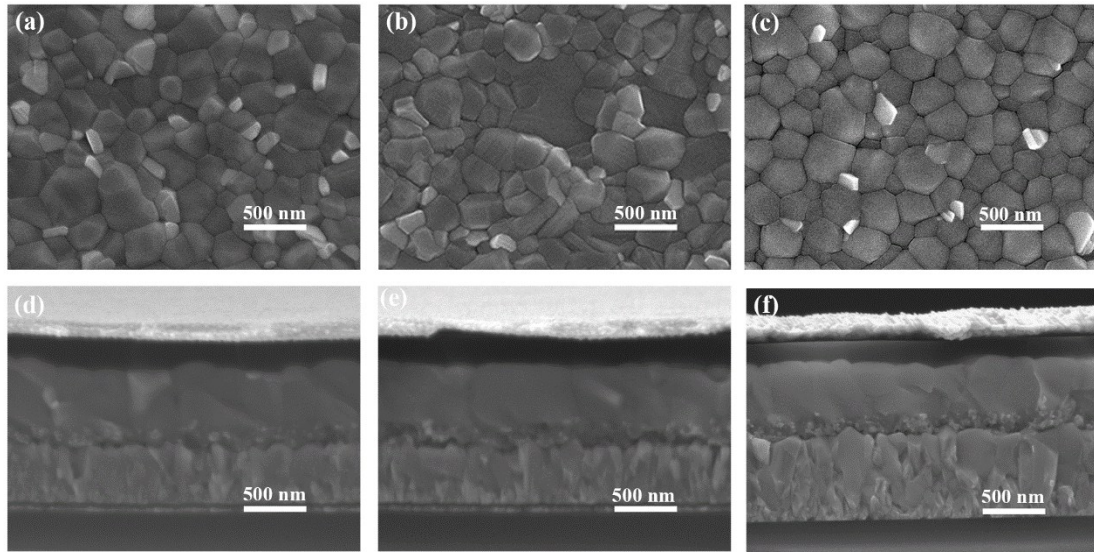

**Figure S6.** (a–c) Top-view SEM images of (a) FA/MA/Cs, (b) FA/MA, and (c) FA/Cs perovskite films that had been prepared through treatment with DIE. (d–f) Cross-sectional SEM images of complete (d) FA/MA/Cs, (e) FA/MA, and (f) FA/Cs perovskite devices.



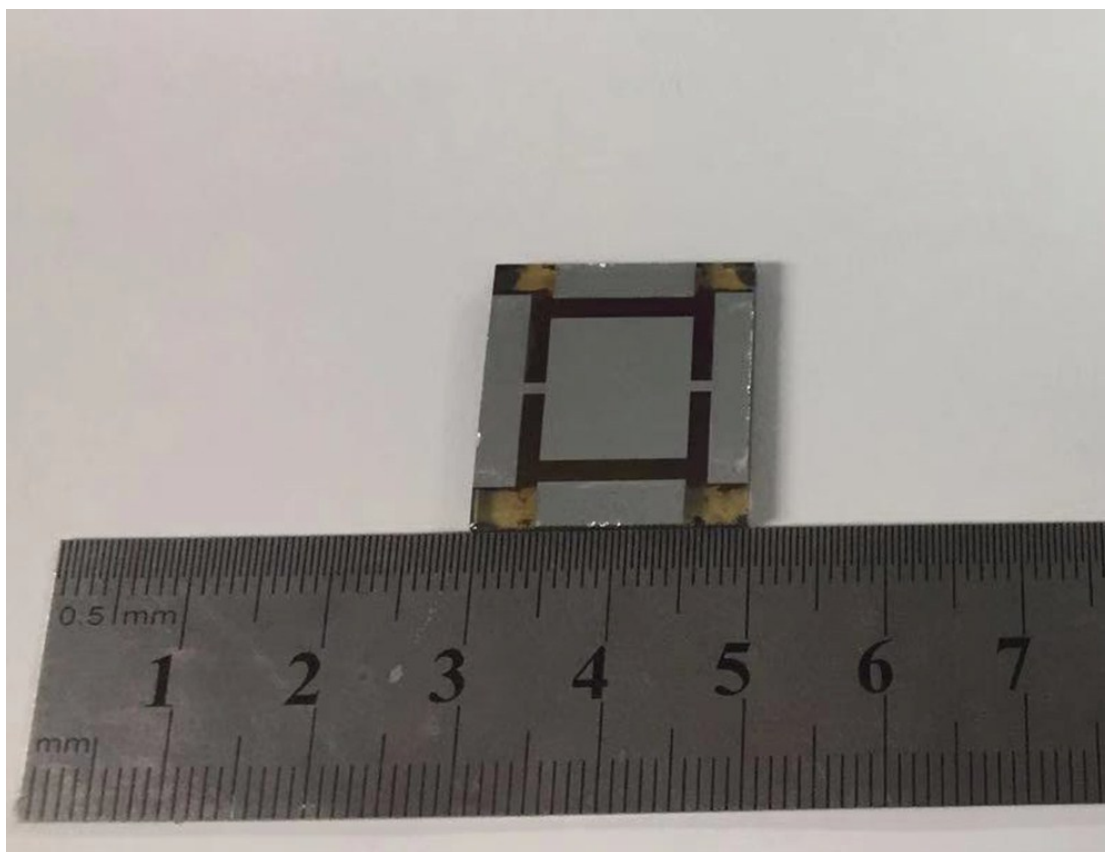

**Figure S7.** Photograph of a 1-cm<sup>2</sup> FA/MA/Cs PSC that had been prepared through treatment with DIE.

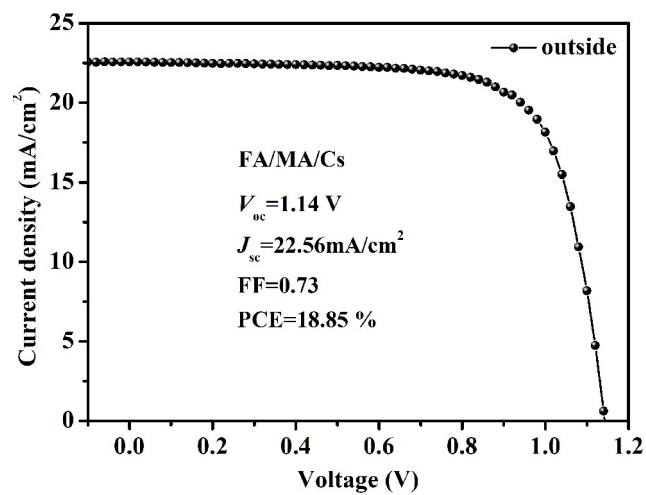

**Figure S8.** Current density–voltage ( $J$ – $V$ ) curve of the best-performing triple-anion PSC that had been prepared through treatment with DIE under ambient conditions (RH: 30–35%).

## References

1. C. Reichardt and E. Harbusch-Görnert, *Liebigs Annalen der Chemie*, 1983, **1983**, 721-743.
2. M. Saliba, T. Matsui, J.-Y. Seo, K. Domanski, J.-P. Correa-Baena, M. K. Nazeeruddin, S. M. Zakeeruddin, W. Tress, A. Abate and A. Hagfeldt, *Energy Environ. Sci.*, 2016, **9**, 1989-1997.
3. M. M. Byranvand, S. Song, L. Pyeon, G. Kang, G.-Y. Lee and T. Park, *Nano Energy*, 2017, **34**, 181-187.
4. M. Zhang, Z. Wang, B. Zhou, X. Jia, Q. Ma, N. Yuan, X. Zheng, J. Ding and W. H. Zhang, *Solar RRI*, 2018, **2**, 1700213.
5. Z. Wang, Q. Lin, B. Wenger, M. G. Christoforo, Y.-H. Lin, M. T. Klug, M. B. Johnston, L. M. Herz and H. J. Snaith, *Nat. Energy*, 2018, **3**, 855-861.
6. T. Singh and T. Miyasaka, *Adv. Energy Mater.*, 2018, **8**, 1700677.
7. M. Yavari, M. Mazloum - Ardakani, S. Gholipour, M. M. Tavakoli, S. H. Turren - Cruz, N. Taghavinia, M. Grätzel, A. Hagfeldt and M. Saliba, *Adv. Energy Mater.*, 2018, **8**, 1800177.
